# Supplementary material
Source: publisher figshare collection journal article supplement (https://acs.figshare.com/ndownloader/files/17915330)
Supplement: Supplementary file 1 [file 17915330]

## MChem Miniproject Marksheet

Student .....

Supervisor .....

| (NB fractional marks are permitted)                                                                         |                   |
|-------------------------------------------------------------------------------------------------------------|-------------------|
| <b>Scientific content</b> (based on individual report) (weighted at 27.3%)                                  | mark from<br>0-10 |
|                                                                                                             |                   |
| <b>Quality of presentation</b> (based on individual report) (weighted at 18.2%)                             |                   |
|                                                                                                             |                   |
| <b>Clarity of writing</b> (based on individual report) (weighted at 18.2%)                                  |                   |
|                                                                                                             |                   |
| <b>Volume and quality of results</b> (based on group results) (weighted at 18.2%)                           |                   |
|                                                                                                             |                   |
| <b>Quality of analysis, interpretation etc.</b> (individual contribution to group work) (weighted at 9.1%)  |                   |
|                                                                                                             |                   |
| <b>Contribution to team-working, safety, lab book, etc.</b> (based on group performance) (weighted at 9.1%) |                   |
|                                                                                                             |                   |
